# Supplementary material for: Cdx2 regulates immune cell infiltration in the intestine
Source: PubMed Central journal article supplement (PMC8339112; doi:10.1038/s41598-021-95412-w), 2021-08-04

Supplementary Table 1 List of PCR primers used.

| Gene Name             | Primer sequence                                      | Ta    |
|-----------------------|------------------------------------------------------|-------|
| Actin RT-PCR          | F: CCCTAAGGCCAACCGTGAAA<br>R: GTCCTATGGGAGAACGGCAG   | 54 °C |
| Cdx2 RT-PCR           | F: AGCCAAGTGAAAACCAGGACAA<br>R: TGCAAGGAGGTCACAGGACT | 54 °C |
| SIS RT-CRP            | F: GCGTAGAGAGAGGGCTGCATA<br>R: GCCCGTTGCCAATTTTTGAG  | 53 °C |
| H2-T3 Q-PCR           | F: CAATGGTGGAAACGGAGACG<br>R: GAGTGCCTCAGATTCAGCCC   | 58 °C |
| GAPDH Q-PCR           | F: GGCCGGTGCTGAGTATGTCG<br>R: TTCAAGTGGGCCCCCGGCCTT  | 58 °C |
| H2-T3 Promoter region | F: GGCTGTTTCCCTCCTCATCC<br>R: AAAGGCCTTGCACTCCTGTT   | 52 °C |

Supplementary Table 2 list of flow cytometry antibodies

| Target Protein | Catalogue number<br>(all from Bio-Legend) |
|----------------|-------------------------------------------|
| Fc blocking    | 101319                                    |
| CD45           | 103125                                    |
| CD8 $\alpha$   | 100713                                    |
| CD4            | 100515                                    |
| CD335          | 137607                                    |
| CD11c          | 117309                                    |
| F4/80          | 123109                                    |
| Granzyme B     | 372207                                    |
| CD8 $\beta$    | 126605                                    |
| Cd206          | 141703                                    |
| Cd11b          | 101205                                    |

**Supplementary Figure 1.** Cdx-dependent immune cell recruitment. Intestinal epithelial and associated cells were collected 4 or 5 days post-tamoxifen treatment and CD45-positive populations analyzed by flow cytometry. **A.** Scatter plots of CD45 cells, assessed for CD8 $\alpha$  vs CD8 $\beta$ , CD4 vs F4/80, CD11C and CD206 to differentiate inflammatory vs anti-inflammatory macrophages, **B.** Specific cell populations were compared as a percentage of total immune cells. CD8 $\alpha$  cells were depleted at both time points, while inflammatory macrophage populations were increased 4 days post treatment. \*  $p \leq 0.05$ , \*\*  $p < 0.01$ , \*\*\*  $p < 0.001$  by ANOVA.

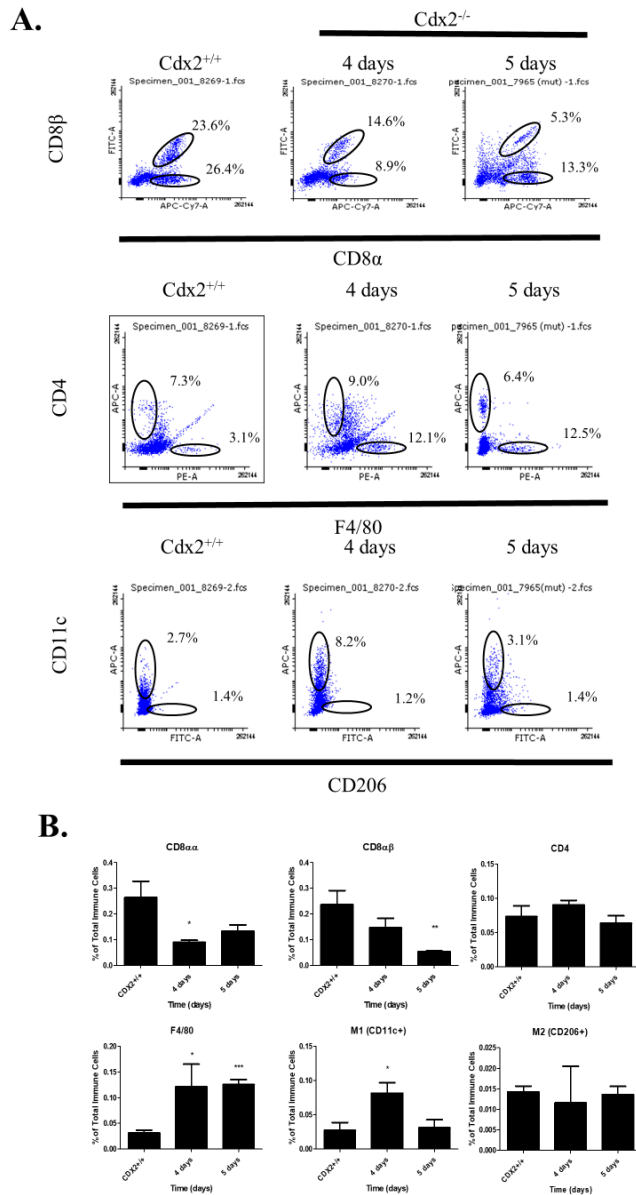

**Supplementary Figure 2.** Full gel images for CDX2 expression in knock out mice by western blot and RT-PCR

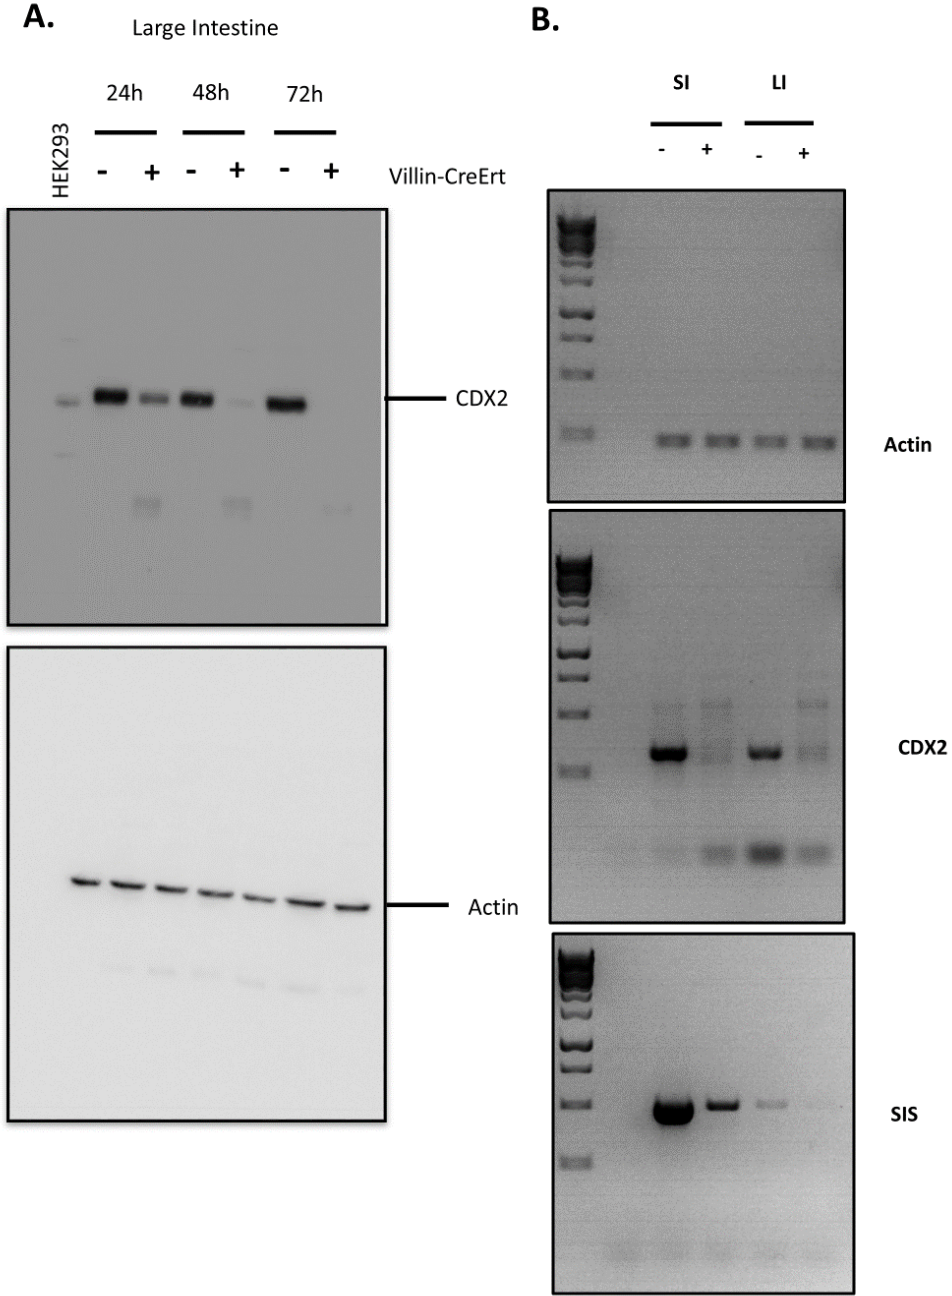

Supplementary Figure 3. Full gel images for ChIP data of CDX2 pull-down.

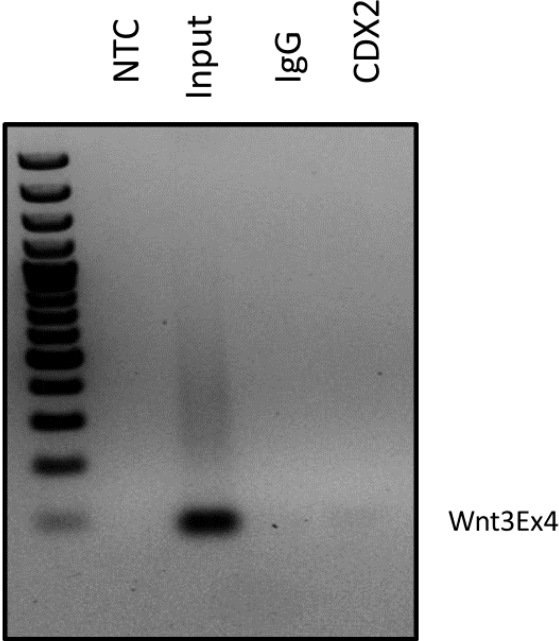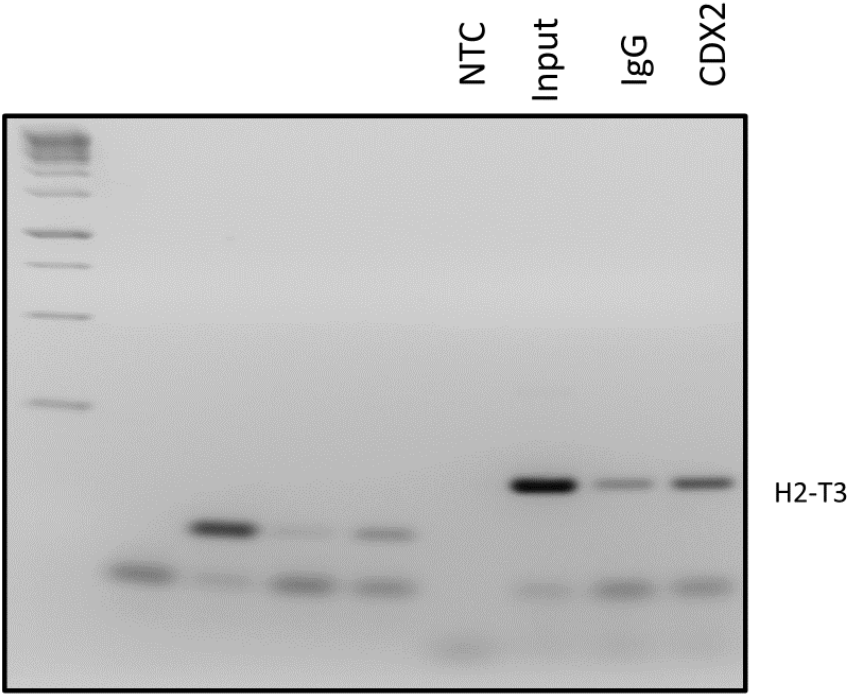

Supplement: 41598_2021_95412_MOESM1_ESM.pdf [file 41598_2021_95412_MOESM1_ESM.pdf]
